# Supplementary material
Source: HighWire-hosted journal article supplement (https://bmjophth.bmj.com/content/6/1/e000749)
Supplement: inline-supplementary-material-1 [file inline-supplementary-material-1.pdf]

**Supplementary S1:** Outcome measures at the end of 12 months according to injection subtype

|                                | <b>nAMD<br/>(N=19)</b> | <b>DMO<br/>(N=20)</b> | <b>RVO<br/>(N=17)</b> | <b>P*</b>                |
|--------------------------------|------------------------|-----------------------|-----------------------|--------------------------|
| <b>Bevacizumab</b>             |                        |                       |                       |                          |
| BCVA change<br>(ETDRS letters) | 6<br>(-9 to 25)        | 1<br>(0 to 16)        | 15<br>(-20 to 35)     | <b>0.020<sup>†</sup></b> |
| CMT change (µm)                | -40<br>(-303 to -1)    | -67<br>(-482 to 50)   | -134<br>(-475 to 43)  | 0.202 <sup>‡</sup>       |
| Number of<br>Injections        | 10<br>(6 to 17)        | 8<br>(3 to 13)        | 10<br>(5 to 13)       | 0.206                    |
| Final BCVA<br>(ETDRS letters)  | 68<br>(20 to 80)       | 71<br>(11 to 85)      | 67<br>(0 to 78)       | 0.333                    |
| Final CMT(µm)                  | 259<br>(215 to 524)    | 293<br>(226 to 460)   | 293<br>(222 to 710)   | 0.057                    |
| <b>Mixed injection</b>         | <b>N=22</b>            | <b>N=13</b>           | <b>N=9</b>            |                          |
| BCVA change<br>(ETDRS letters) | 2.5<br>(-30 to 40)     | 2<br>(-5 to 20)       | 10<br>(-18 to 22)     | 0.573 <sup>‡</sup>       |
| CMT change (µm)                | -90<br>(-340 to 81)    | -54<br>(-455 to 10)   | -172<br>(-478 to -14) | <b>0.040<sup>§</sup></b> |
| Number of<br>Injections        | 11<br>(5 to 14)        | 10<br>(7 to 12)       | 10<br>(9 to 13)       | 0.239                    |

Abbreviations: BCVA=best corrected visual acuity; CMT=central macular thickness; DMO=diabetic macular oedema; ETDRS=early treatment diabetic retinopathy study; nAMD=neovascular age-related macular degeneration; RVO=retinal vein occlusion

Data are medians (range). \*p-values are global p-values testing for a difference between any of the diseases. (Kruskal-Wallis for continuous variables). For comparisons that are significant at the global level, adjusted pairwise p-values for individual study comparisons are reported. Significant p-values are bolded.

<sup>†</sup> nAMD vs DMO p=0.471; **DMO vs RVO p=0.015**; nAMD vs RVO p=0.480

<sup>§</sup> nAMD vs DMO p=1.000; **DMO vs RVO p=0.050**; nAMD vs RVO p=0.085

**Note:** <sup>‡</sup> our sub-cohort might be under-powered to detect any statistical significance due to very small sample size
